# Supplementary material for: CD44, γ-H2AX, and p-ATM Expressions in Short-Term Ex Vivo Culture of Tumour Slices Predict the Treatment Response in Patients with Oral Squamous Cell Carcinoma
Source: MDPI journal article supplement (doi:10.3390/ijms23020877), 2022-01-14
Supplement: s1 [file s1]

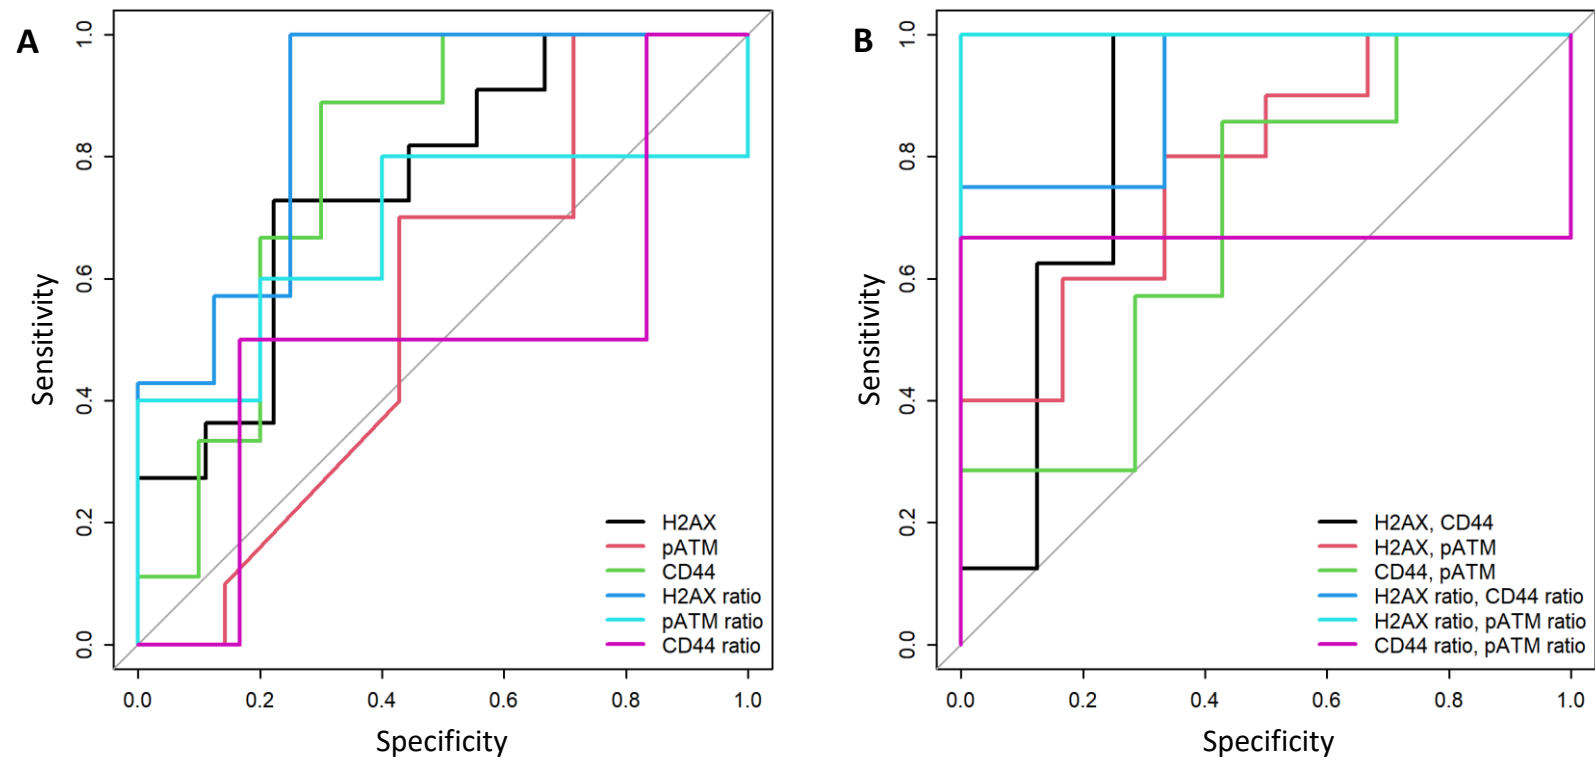

**Figure S1** : Receiver operating characteristic (ROC) curve for the different biomarkers ( $\gamma$ -H2AX, pATM, CD44,  $\gamma$ -H2AX 0 Gy/4 Gy ratio, pATM 0 Gy/4 Gy ratio, CD44 0 Gy/4 Gy ratio) alone (A) or combined (B).
